# Supplementary material for: Relation between metastable zone width and induction time of butyl paraben in ethanol
Source: Royal Society of Chemistry journal article supplement (doi:10.1039/c4ce01625d), 2014-11-05
Supplement: c4ce01625d1.pdf [file c4ce01625d1.pdf]

## Supporting information

Table 3 Experimental<sup>12,27</sup> ( $MSZW_{exp}$ ) and extrapolated ( $MSZW_{extr}$ ) metastable zone widths for isonicotinamide and paracetamol in ethanol

| Isonicotinamide          |                     |                      | Paracetamol              |                     |                      |
|--------------------------|---------------------|----------------------|--------------------------|---------------------|----------------------|
| Cooling rate<br>(K/hour) | $MSZW_{exp}$<br>(K) | $MSZW_{extr}$<br>(K) | Cooling rate<br>(K/hour) | $MSZW_{exp}$<br>(K) | $MSZW_{extr}$<br>(K) |
| 60                       | 17.1                | 14.63                | 60                       | 21.00               | 19.20                |
| 30                       | 12.6                | 12.59                | 42                       | 17.50               | 17.05                |
| 24                       | 11.9                | 12.06                | 30                       | 14.96               | 15.41                |
| 6                        | 7.65                | 9.64                 | 12                       | 11.12               | 12.22                |

Table 4 Parameters employed in extrapolation of metastable zone widths from induction time experiments<sup>16,26</sup>

|     | M<br>(g/mol) | Density<br>( $g/cm^{-3}$ ) | $\ln AV$ | $V_m$<br>( $10^{-28}m^3$ ) | $\sigma$<br>( $mJ/m^2$ ) | $\frac{1}{N^{\frac{1}{3}}}$<br>(kJ) | $A_s$   | $B_s$  | $C_s$  |
|-----|--------------|----------------------------|----------|----------------------------|--------------------------|-------------------------------------|---------|--------|--------|
| INA | 122.12       | 1.204                      | 4.504    | 1.684                      | 3.347                    | 2.603                               | 208.941 | 14.472 | 0.0352 |
| PAM | 151.16       | 1.263                      | 5.468    | 1.987                      | 2.090                    | 1.516                               | 1.490   | -2.175 | 0.0218 |

$\times 10^{-13}$

INA: Isonicotinamide, PAM: Paracetamol, M: molecular weight, Molecular weight of ethanol is 46.07 g/mol,  $\sigma$ : solid-liquid interfacial energy. Solubility parameters are estimated from solubility<sup>12,27</sup>.
